# Supplementary material for: Electro-nucleation of water nano-droplets in No Man's Land to fault-free ice Ic
Source: Royal Society of Chemistry journal article supplement (doi:10.1039/c7cp07406a), 2018-01-01
Supplement: c7cp07406a2.pdf [file c7cp07406a2.pdf]

## Supplementary Information

for

### Electro-nucleation of water nano-droplets in No Man's Land to fault-free ice Ic

Prithwish K. Nandi<sup>1\*†</sup>, Christian J. Burnham<sup>+</sup> and Niall J. English<sup>\*+</sup>

<sup>+</sup> *School of Chemical and Bioprocess Engineering, University College Dublin, Belfield, Dublin 4, Ireland*

<sup>†</sup> *Irish Centre for High-End Computing, Grand Canal Quay, Dublin 2, Ireland*

(a) Distribution of intrinsic electric fields

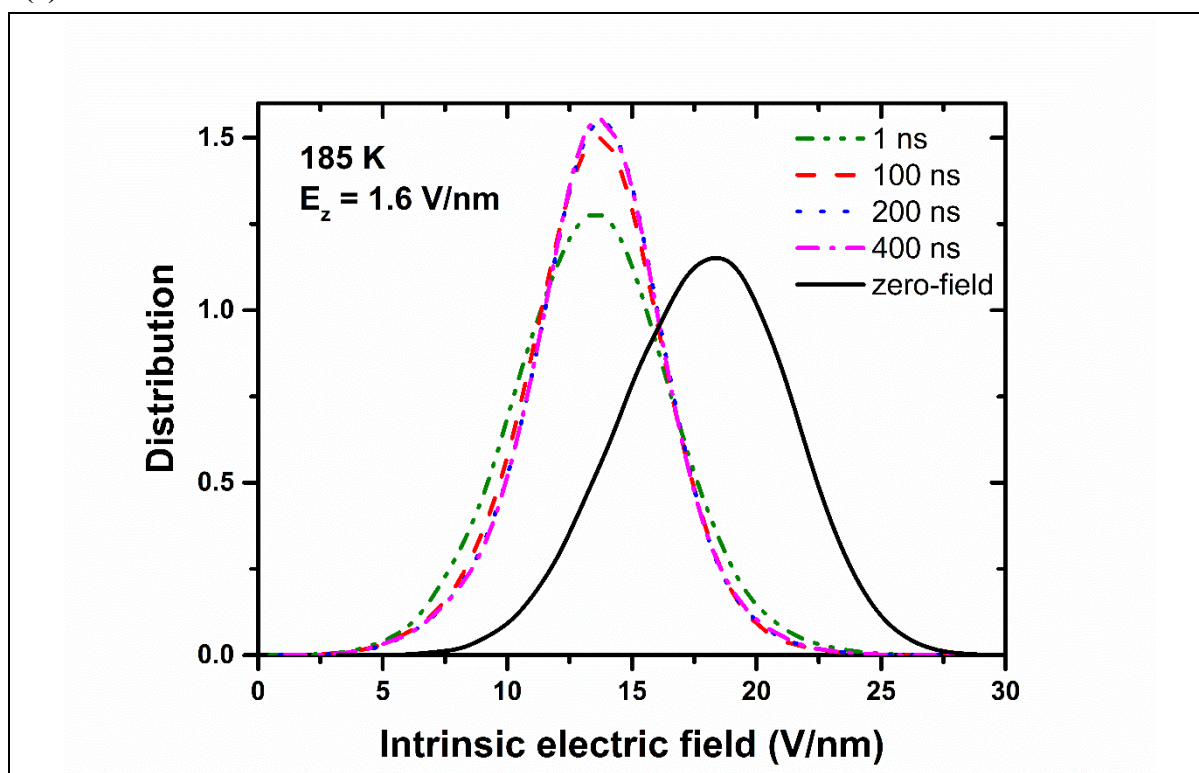

Figure S1. Probability distribution of the intrinsic electric field, *i.e.*, that experienced by a molecule due to all others in the system, under zero-field conditions and also in a 1.6 V/nm field at 185 K at various times (as a typical example). Here, the Coulombic forces were evaluated on each charge site without any cut-off whatsoever from other molecules (excluding the force from the external field), via real-space Coulomb's law, from Smooth-Particle-Mesh-Ewald-propagated MD, and  $E$  at each such site  $i$  defined as  $f_i / q_i$ , with its magnitude then taken.

\* Corresponding authors: prithwish.nandi@ichec.ie, niall.english@ucd.ie, Tel: +353-1-7161646 - NE, +353-1-5241608 (ext. 22) - PN, Fax: +353-1-7161177 - NE

## **(b) Further comments on applied-field intensities, and justification of 0.2 - 2.5 V/nm range used**

As mentioned in the main text, in the physical system of the present study, covalent bonds are mechanically prevented from rupture. Therefore, even for very large fields of  $\sim 2\text{-}5$  V/nm (where external forces are clearly often a deal larger than 15-20% of the intermolecular, regular intrinsic-system forces, and non-linear effects overtly large) water molecules would not exhibit dissociation; clearly, however, this would happen in Nature. Although Saitta and co-workers have pioneered recently very interesting picosecond-scale non-equilibrium *ab initio* MD on water break-up in such very large-magnitude fields, in various environments,<sup>S1</sup> these break-up events were not observed below  $\sim 2\text{-}5$  V/nm, due to necessarily very short timescales. In any event, in the present study, water break-up, in terms of dissociation of chemical bonding would not happen even such very large external fields, although we do not pursue NE-MD with fields larger than 2.5 V/nm, so as to keep external-field forces<sup>15</sup> at less than  $\sim 18\%$  of intrinsic-system ones.

A further motivation to adhere to the general 0.2 - 2.5 V/nm external-field intensity range, apart from the main text mentioning a phase-transition ‘control’ threshold of  $\sim 1.5$  V/nm found previously for hydrate nano-clusters<sup>25</sup> and being in the general region of external-field forces straddling 10% of intrinsic ones, lies in the fact that the general region of  $\sim 0.2\text{-}0.5$  V/nm is considered by many workers, with a very good deal of supporting evidence<sup>15</sup>, to represent the cusp of a linear-to-non-linear transition in the system-response régime, in terms of non-equilibrium MD ‘driving’ system translational and rotational effects. Naturally, this depends on the precise property being considered to gauge system response<sup>15</sup>. In any event, the range of 0.2 - 2.5 V/nm provides a compromise between being able to witness phase-transition kinetics and structuring effects in the linear and mildly non-linear régime over nanosecond time scales straddling the previously-identified phase-transition-effect threshold of  $\sim 1.5$  V/nm for hydrate nano-clusters<sup>25</sup> together with avoiding excessively large field intensities with strong and pronounced non-linear system response (above around 2.5 V/nm), which would certainly be expected to lead to some probable water molecular-dissociation events over nanosecond time scales<sup>S1</sup> if the system were not composed of rigid TIP4P/2005 water molecules.

More widely, in previous MD simulations of bulk-water electro-freezing<sup>15-22</sup>, substantially large external-field strengths have been used. For instance, Svishchev and Kusalik used a value of 5 V/nm in their studies of electro-crystallisation<sup>16,17</sup>, whilst Radhakrishnan and Trout used a value of 10 V/nm<sup>18</sup>, and, recently, Luedtke *et al.*<sup>39</sup> have used field strengths up to 2 V/nm, and shown that electro-crystallisation in formamide is achieved for larger fields. Indeed, a knowledgeable discussion on the rather common occurrence of external field strengths of up to several volts per nanometre has also been provided by Luedtke *et al.*<sup>39</sup> where they mentioned correctly that the field strength at the tip of the Taylor cone of an electro-spray device, or in the high-curvature region of a dielectric/ionic mixture-liquid droplet could easily experience external-field strengths of the order of up to several volts/nanometre.

In order to identify the critical external-field ‘threshold’ strength required to observe field-induced shape elongation, and subsequent electro-crystallisation, simulations at field strengths of 0.2 and 0.5 V/nm indicate the development of aspherical ‘bulging’ of the initially spherically droplet within 1  $\mu\text{s}$ , suggesting probable further elongation and further crystallisation upon extending simulations over multiple microseconds at 0.2 V/nm, for all three temperatures studied. In 0.5 V/nm fields, we observe characteristic water-droplet elongation and the initial signatures of nucleation centres for 185 and 200 K. For the 0.8 V/nm case, full nucleation occurs at 185 K. However, at 150 K, although shape elongation of the droplet is observed, no nucleation occurred by the end of the 1  $\mu\text{s}$  simulation. Nucleation at 150 K is seen in 1.2 V/nm fields near the end of the 1  $\mu\text{s}$  simulation. A brief summary of shape transformation and nucleation observed for various conditions is presented below (Table S1).

S1. Saitta, A. M.; Saija, F. Miller experiments in atomistic computer simulations. *Proc. Natl. Acad. Sci. U. S. A.*, **2014**, *111*, 13768.

Table S1: Field-strength and temperature effects on morphology deformation and nucleation

|                  | T (K) | 0.2 V/nm                      | 0.5 V/nm                            | 0.8 V/nm | 1.2 V/nm                            | 1.6 V/nm | 2 V/nm  | 2.5 V/nm |
|------------------|-------|-------------------------------|-------------------------------------|----------|-------------------------------------|----------|---------|----------|
| Shape elongation | 150   | No                            | No                                  | Yes      | Yes                                 | Yes      | Yes     | yes      |
|                  | 185   | Slight aspherical bulging     | Yes                                 | Yes      | Yes                                 | Yes      | Yes     | Yes      |
|                  | 200   | Slight aspherical bulging     | Yes                                 | Yes      | Yes                                 | Yes      | Yes     | Yes      |
| Nucleation       | 150   | No                            | No                                  | No       | Initial nucleation centres observed | Partial  | Partial | Partial  |
|                  | 185   | Not achieved within 1 $\mu$ s | Initial nucleation centres observed | Yes      | Yes                                 | Yes      | Yes     | Yes      |
|                  | 200   | Not achieved within 1 $\mu$ s | Initial nucleation centres observed | Yes      | Yes                                 | Yes      | Yes     | Yes      |

(c) Dipolar Distribution

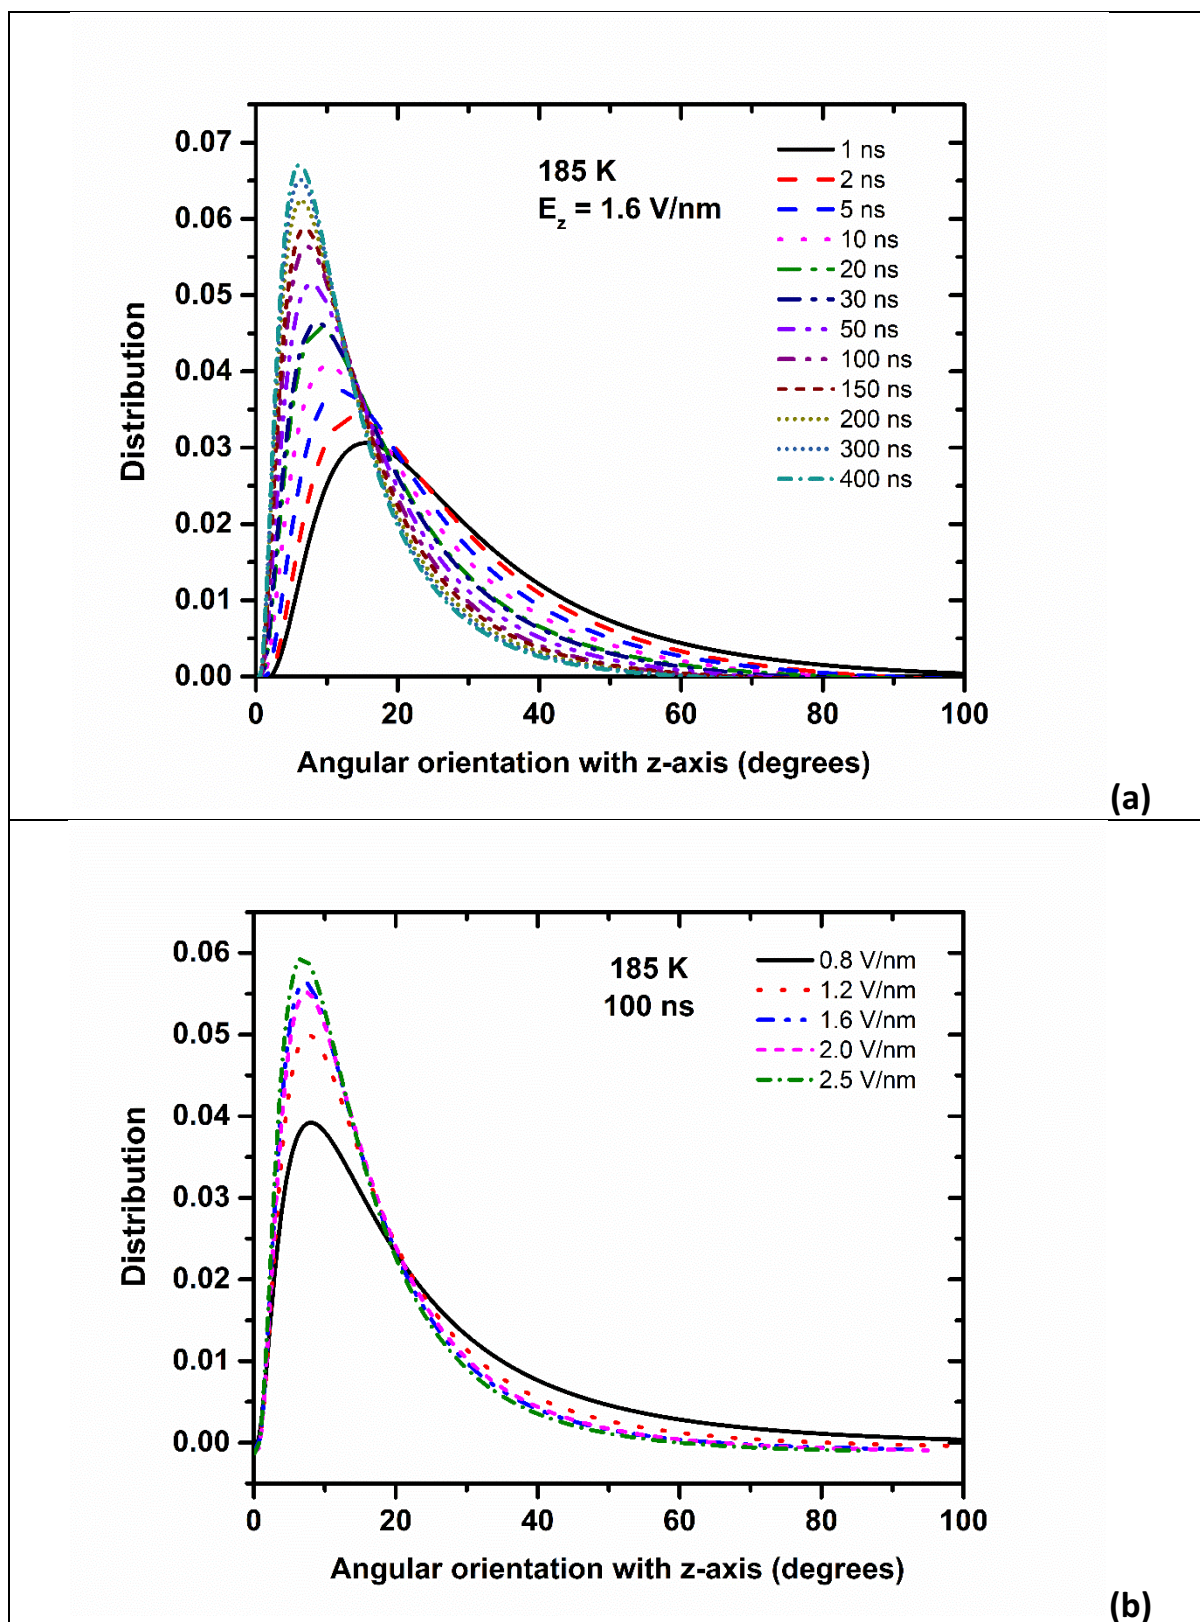

Figure S2: Distribution of molecules' dipolar orientation relative to the external-field direction (the laboratory  $z$ -axis). In (a), as a typical example, reorientation is shown as a function of simulation time at 1.6 V/nm field at 185 K, whilst (b) depicts this at after 100 ns for increasing field strengths.



(d) Aspect ratios

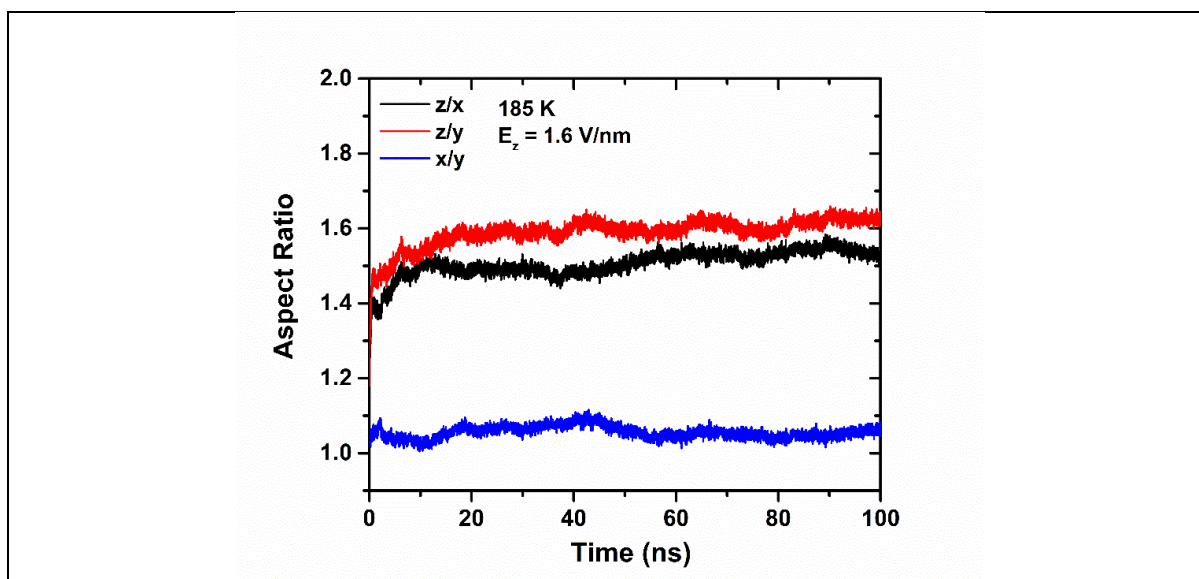

Figure S3(a):  $z/x$ ,  $z/y$  and  $x/y$  aspect ratios, underscoring field-mediated  $z$ -axis elongation; 185 K and 1.6 V/nm is shown here as a typical (and dramatic) example. The aspect ratio is defined in terms of laboratory-axis directional length ratios, where the directional length is gauged from the average of the 2% most extreme coordinate values at each end defining the length along of a particular direction; here, this is essentially restricted to surface molecules, where there are at least two other molecules within 0.35 nm distance. Changing the ‘end-definition’ threshold between 1 and 5% led to no real change in the aspect ratios.

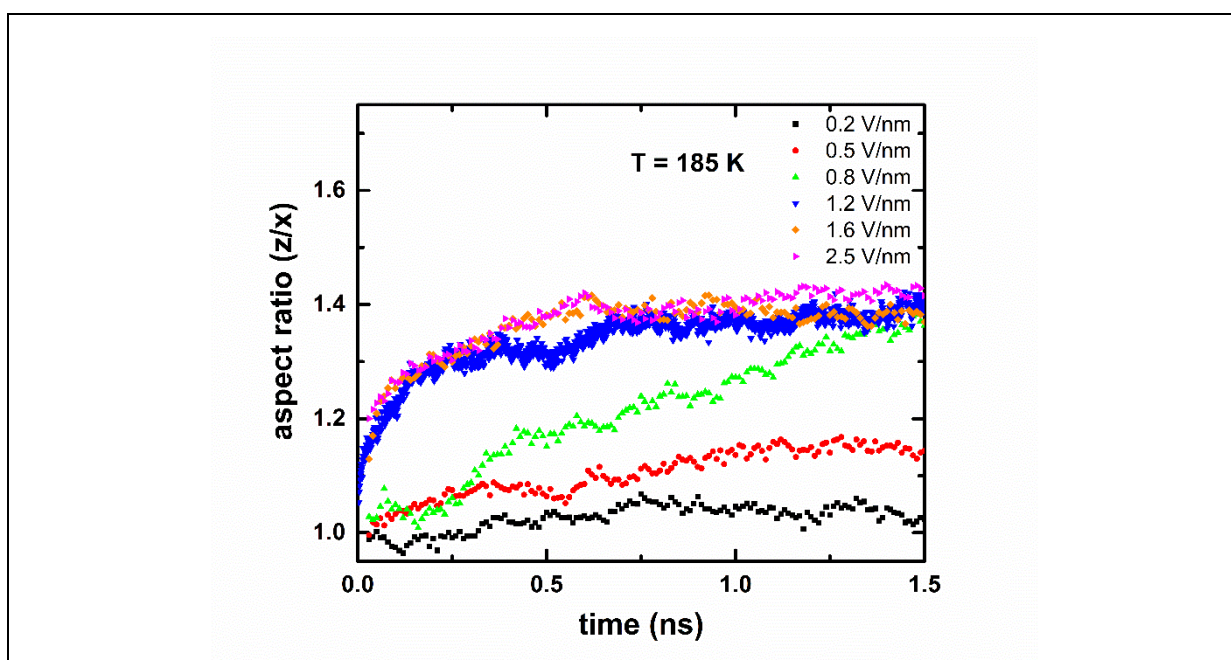

Figure S3(b):  $z/x$  aspect ratio, underscoring field-mediated  $z$ -axis elongation at 185 K for field intensities varying from 0.2 -2.5 V/nm. Clearly, the onset of shape elongation scales with external-field intensity, suggesting that for observation of similar elongation at much lower field strengths relevant to naturally-occurring static fields in the atmosphere ( $10^3 - 10^5$  V/m),<sup>28,29</sup> simulations need to be run over timescales of the order of a millisecond or longer, which are not yet routinely-accessible with modern-day supercomputers.

**(e) Moment-of-Inertia Eigenvalues:**

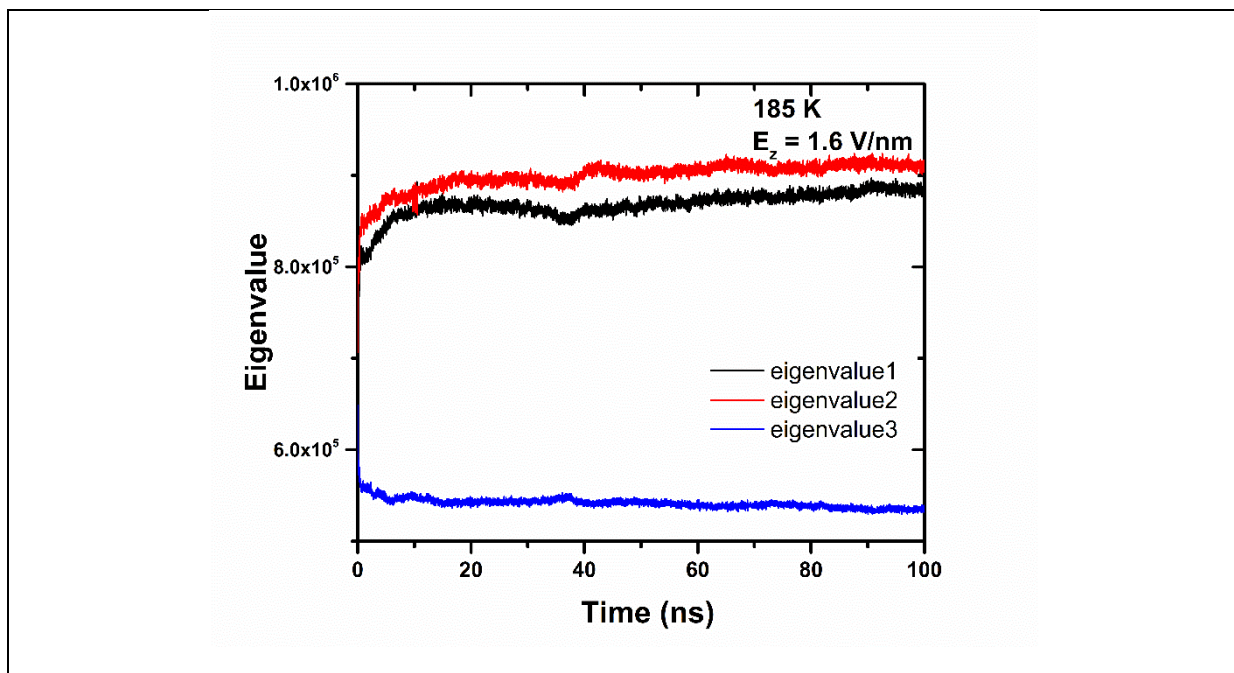

Figure S4. Eigenvalues of the moment-of-inertia tensor at each instant of time during electro-nucleation in a water droplet at 185 K subjected to an external static field of magnitude 1.6 V/nm along the laboratory z-axis. The eigenvalue along one of the principal axes (001) is substantially different from the other two mutually orthogonal axes; this implies an elongation of the resulting ice crystal along the external-field direction which coincides with the direction of this principal axis.

**(f) View of the cross-sections of the ice crystal at 185 K subjected to 1.6 V/nm external field:**

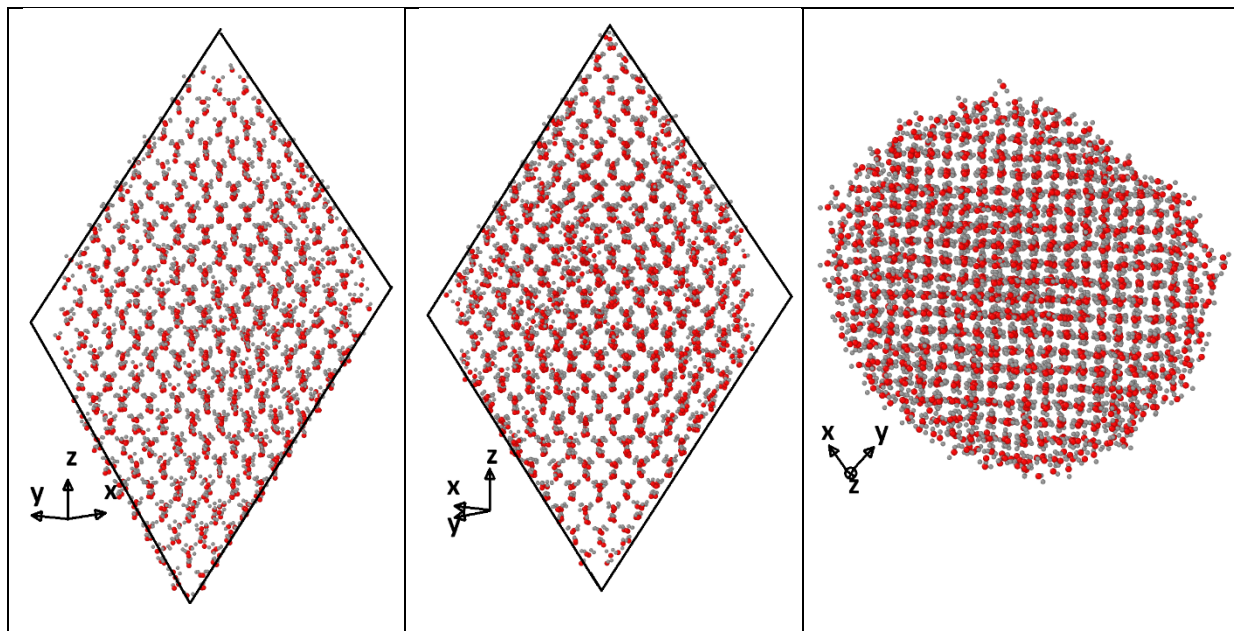

Figure S5. View of the cross-sections along the three principal axes of the electro-nucleated ice crystal at 185 K under a 1.6 V/nm static external field. The rhombus-shaped cross-sections resemble very loosely those of an octahedron, but, when viewed along the z-direction (the direction of the applied external field), it resembles a circle (see main text).

(g) Dipole alignment and proton ordering

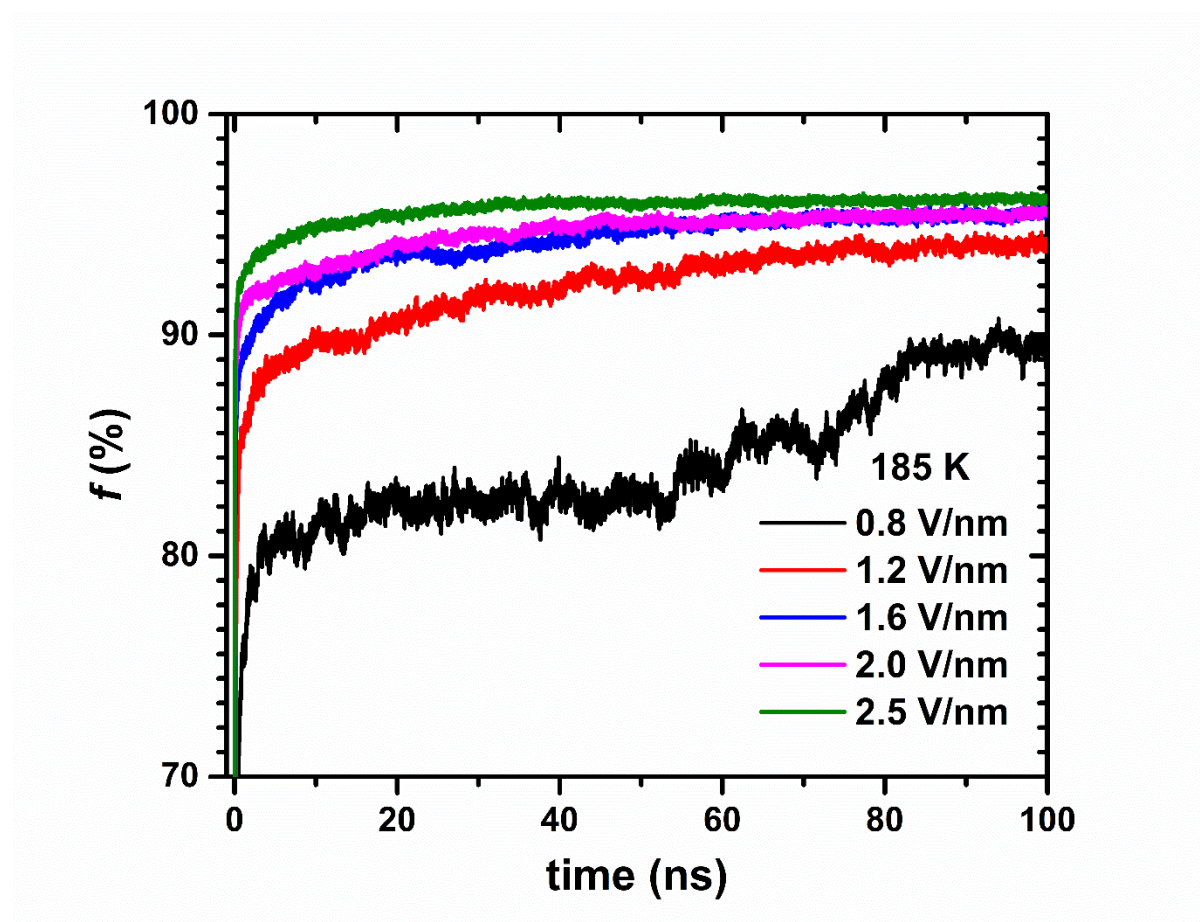

Figure S6. Temporal evolution of dipole alignment, characterising proton ordering, as a function of external field intensity at 185 K for fields of various intensity. The % alignment of the total system dipole (from the vector sum of individual molecular dipoles) along the laboratory  $z$ -axis is found relative to the theoretical level of full alignment of each and every water molecule's perfect dipole alignment along the  $z$ -axis.



## (h) Cubicity and crystallinity measures

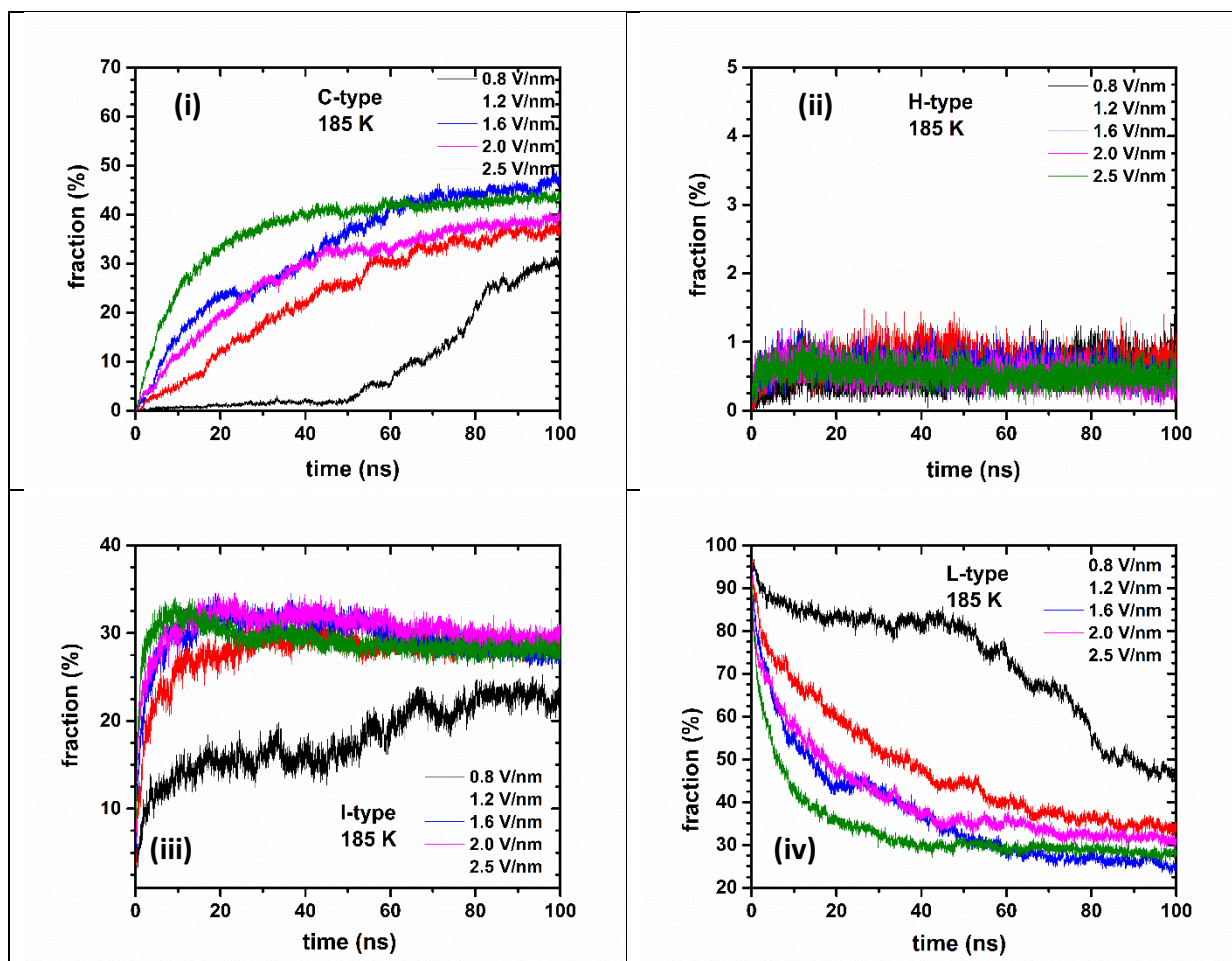

Figure S7. Temporal evolution of crystallinity/‘cubicity’ as a function of external field intensity at 185 K for fields of various intensity. The fraction of water molecules belonging to: (i) cubic ice, (ii) hexagonal ice, (iii) interfacial ice and (iv) liquid phase, as determined by the CHILL algorithm, are shown. The external field is applied along the laboratory  $z$ -axis. Clearly, the external field intensity plays a crucial role in determining the rate of crystallization: as intensity is lowered, the onset of crystallisation is delayed significantly.



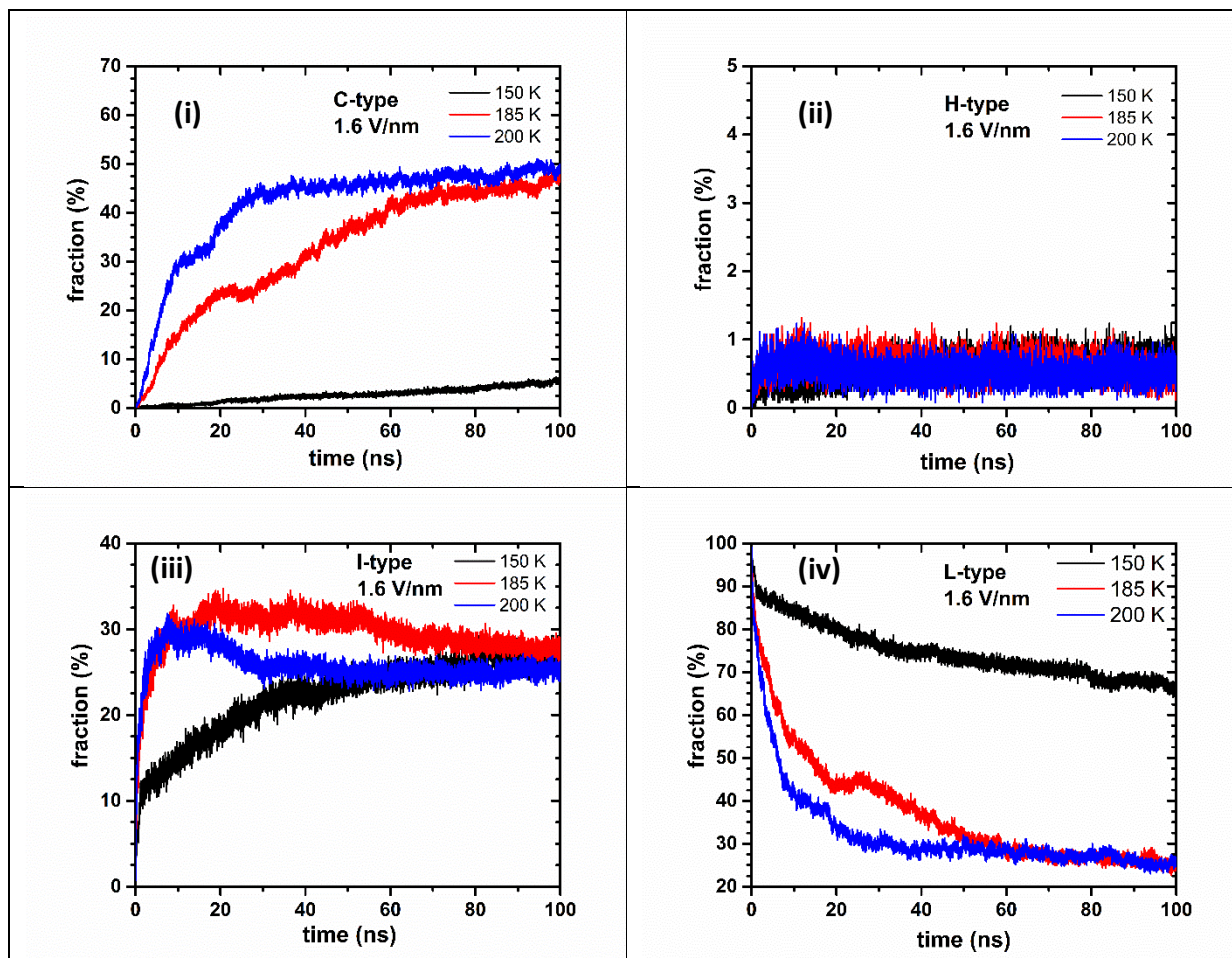

Figure S8. Temporal evolution of crystallinity/ ‘cubicity’ as a function of temperature at an external-field intensity of 1.6 V/nm along the laboratory  $z$ -axis. The fraction of water molecules belonging to: (i) cubic ice, (ii) hexagonal ice, (iii) interfacial ice and (iv) liquid phase, as determined by the CHILL algorithm, are shown. Temperature also plays a crucial role in determining the rate of crystallisation under the influence of external fields.

(i) Cubic- vs. Hexagonal- Ice RDF analysis

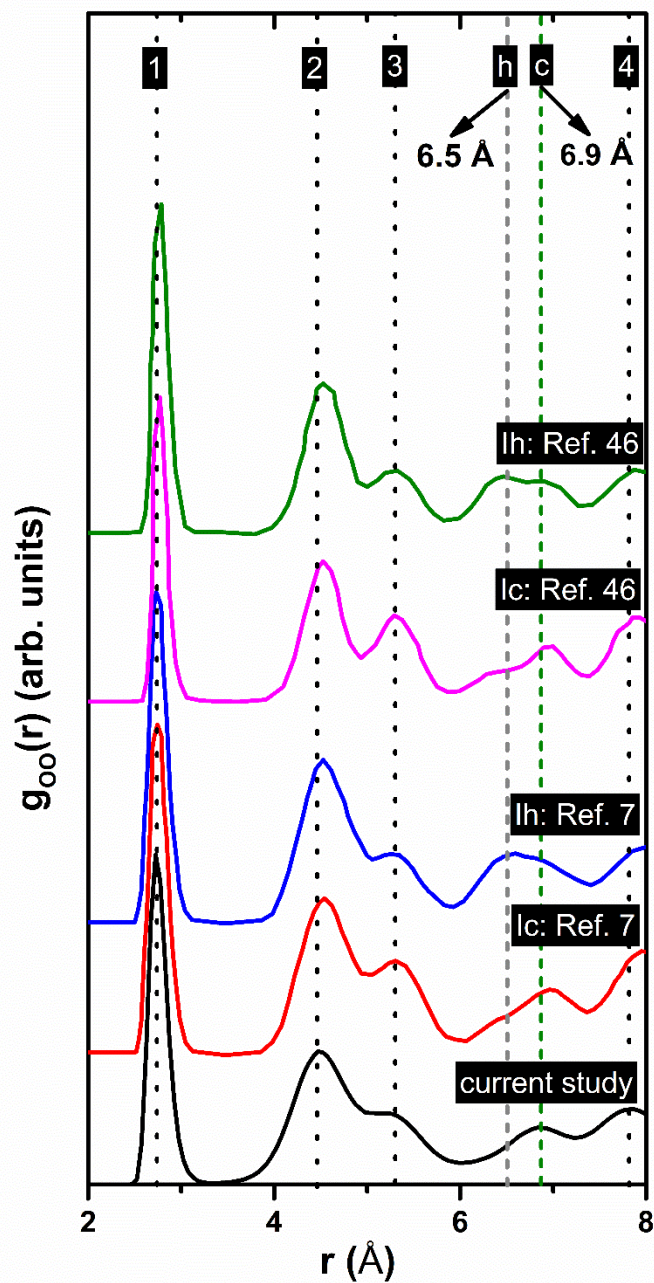

Figure S9: RDF plots from refs. 7 and 46 alongside those of the fully crystalline nano-droplet after 400 ns for the 185 K / 1.6 V/nm case. Peaks are marked as 1, 2 3, h, c and 4. The  $I_c$  and  $I_h$  RDFs are almost indistinguishable, except for the ‘h’ and ‘c’ peaks centred at  $\sim 6.5$  and  $6.9$  Å, respectively. The essential conclusion is that the electro-nucleated is cubic (see main text). For ease of viewing, RDF plots are displaced vertically.

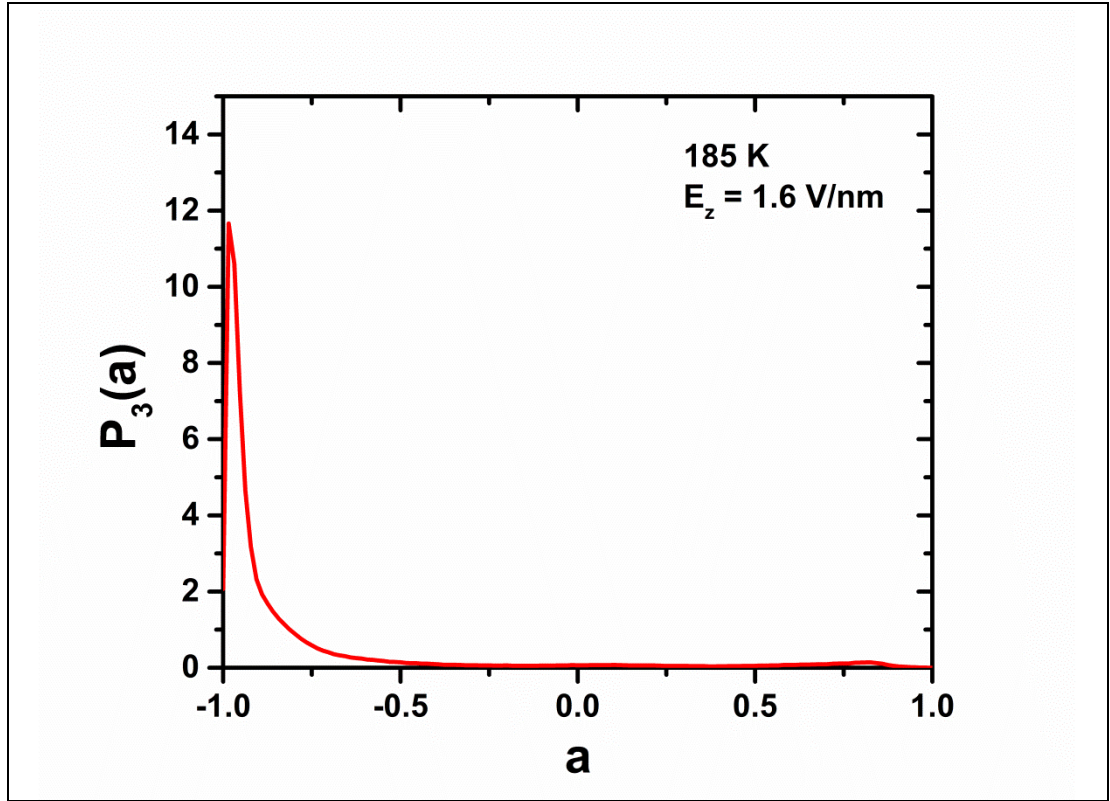

Figure S10. Plots showing the distribution of the alignment of local orientational structure,  $a$ , as defined by eqn. 5 of ref. 36,  $a(i, j) = \frac{\hat{q}_l(i) \cdot \hat{q}_l(j)}{|\hat{q}_l(i)| \cdot |\hat{q}_l(j)|}$ , for  $l = 3$ . In this plot, we show the distribution for the water molecules in the nano-droplet at 185 K subjected to an external static electric field of magnitude 1.6 V/nm. This resembles the distribution for cubic ice ( $I_c$ ), which further confirms the cubic crystalline phase of the electro-nucleated ice-crystal obtained in the present study.



(j) Stability of electro-frozen crystallite upon field removal at 185 K:

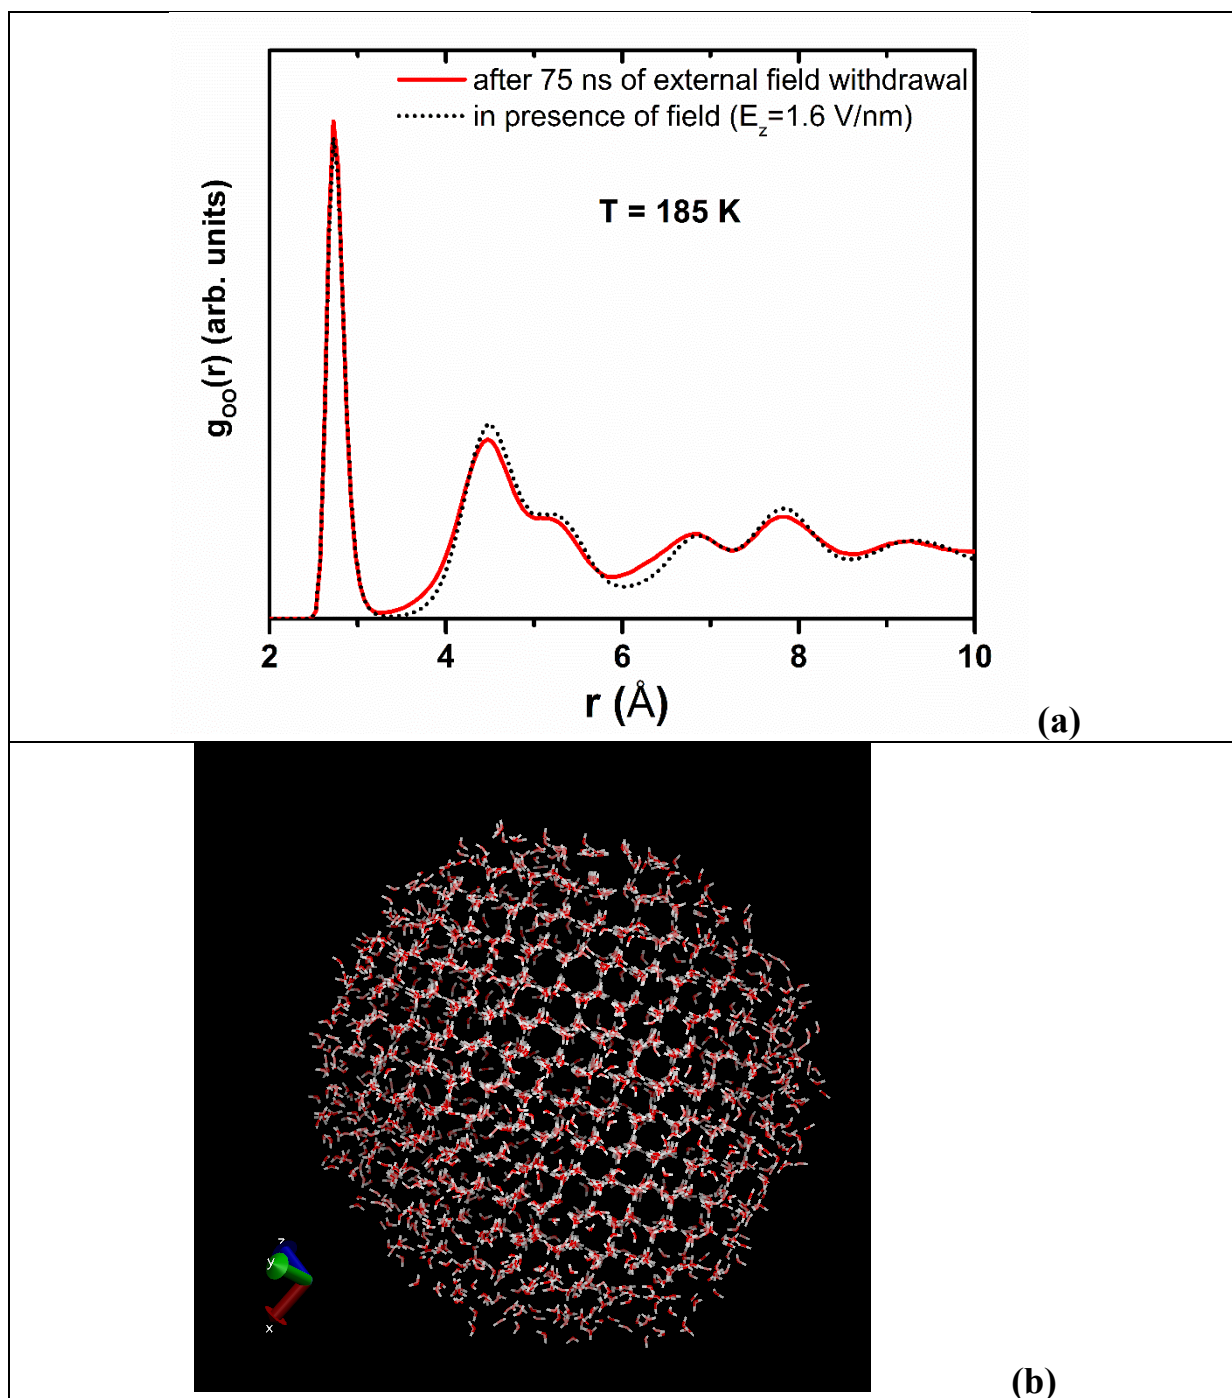

Figure S11. (a) Partial radial distribution function for the O-O pairs of the water nano-droplet at 75<sup>th</sup> nanosecond after the withdrawal of the external field, compared with the RDF of the ice crystallite obtained in the presence of an external field of magnitude 1.6 V/nm at 185 K (after electro-crystallisation). (b) The shape of the ice crystallite has lost the distinct octahedral shape after 75 ns, which was observed in presence of field; it becomes almost spherical in the absence of the external field.

**(k) Additional details on simulation methodology:**

All NE-MD simulations were performed using GROMACS<sup>S2</sup> under periodic boundary conditions with the TIP4P/2005 potential model for water.<sup>S3</sup> The system consists of a spherical water droplet of radius  $\sim 2.5$  nm consisting of 2500 water molecules. The droplet was placed at the centre of a cubic periodic box of size 100 nm so that the interactions between its periodic images is essentially non-existent.

Each simulation run was carried out at constant temperature and constant volume. A Nosé-Hoover<sup>S4</sup> (NH) thermostat was applied to impose the desired system temperature with coupling constant 1 ps. Sudden cooling at the beginning of the simulation exhibits typical oscillatory behaviour of system temperature during a first few picoseconds. After this period, the system temperature oscillated around its prescribed value. We are aware that the initial oscillations are largely affected by the NH thermostat; however, the NH algorithm was chosen because it can reproduce canonical ensemble and its time-reversibility (in contrast to velocity scaling, weak coupling or stochastic approaches).

The system was propagated in time using the leap-frog MD integrator with time step of 3 fs. The relatively long time step was justified by constraining all bond lengths and angles in the system by a LINCS algorithm of fourth order.<sup>S5</sup> We updated the Verlet neighbour list every 10 steps, which we found sufficient by checking zero-field NVE dynamics, where no jumps in potential / total energies were observed, coupled with good energy conservation.

References

- S2. Spoel, D. V. D.; Lindahl, E.; Hess, B.; Groenhof, G.; Mark, A. E.; Berendsen, H. J. C. GROMACS: Fast, flexible, and free. *J. Comput. Chem.* **2005**, 26, 1701-1718.
- S3. Abascal, J. L. F.; Vega, C. A general purpose model for the condensed phases of water: TIP4p/2005. *J. Chem. Phys.* **2005**, 123, 234505.
- S4. Hoover, W. G. Canonical dynamics: Equilibrium phase-space distributions. *Phys. Rev. A* **1985**, 31, 1695-1697.
- S5. Hess, B.; Bekker, H.; Berendsen, H. J. C.; Fraaije, J. G. E. M. LINCS: A linear constraint solver for molecular simulations. *J. Computational Chem.* **1997**, 18, 1463-1472.
